# Supplementary material
Source: PubMed Central journal article supplement (PMC1810055)
Supplement: 15503999supp.pdf [file 15503999supp.pdf]

These are electronic appendices to the Biology Letter by Koehler *et al.* 2004 How well does second-to-fourth-digit ratio in hands correlate with other indications of masculinity in males? *Proc. R. Soc. Lond. B (Suppl.)* **271**, S286–S289. (DOI 10.1098/rsbl.2004.0163.)

Electronic appendices are refereed with the text. However, no attempt has been made to impose a uniform editorial style on the electronic appendices.

### Electronic Appendix A

**Table 2.** Descriptive statistics of all variables assessed. Face and body ratings were made on a scale from 1-7 (1 = not masculine, 7 = very masculine).

|                                              | <u>N</u> | <u>M</u> | <u>SD</u> |
|----------------------------------------------|----------|----------|-----------|
| average<br>left 2D :<br>4D males             | 94       | 0.96     | 0.03      |
| average<br>right 2D :<br>4D males            | 94       | 0.96     | 0.03      |
| average<br>left 2D :<br>4D<br>females        | 100      | 0.97     | 0.03      |
| average<br>right 2D :<br>4D<br>females       | 100      | 0.98     | 0.04      |
| body<br>masculinity<br>rated by<br>males     | 93       | 4.53     | 0.75      |
| body<br>masculinity<br>rated by<br>females   | 93       | 4.32     | 1.01      |
| face<br>masculinity<br>rate by<br>males      | 88       | 4.78     | 0.69      |
| face<br>masculinity<br>rate by<br>females    | 88       | 4.40     | 0.91      |
| left testis<br>volume<br>(cm <sup>3</sup> )  | 43       | 24.2     | 18.5      |
| right testis<br>volume<br>(cm <sup>3</sup> ) | 43       | 23.1     | 12.9      |
| factor<br>score                              | 88       | 0.63     | 0.84      |

Electronic Appendix B

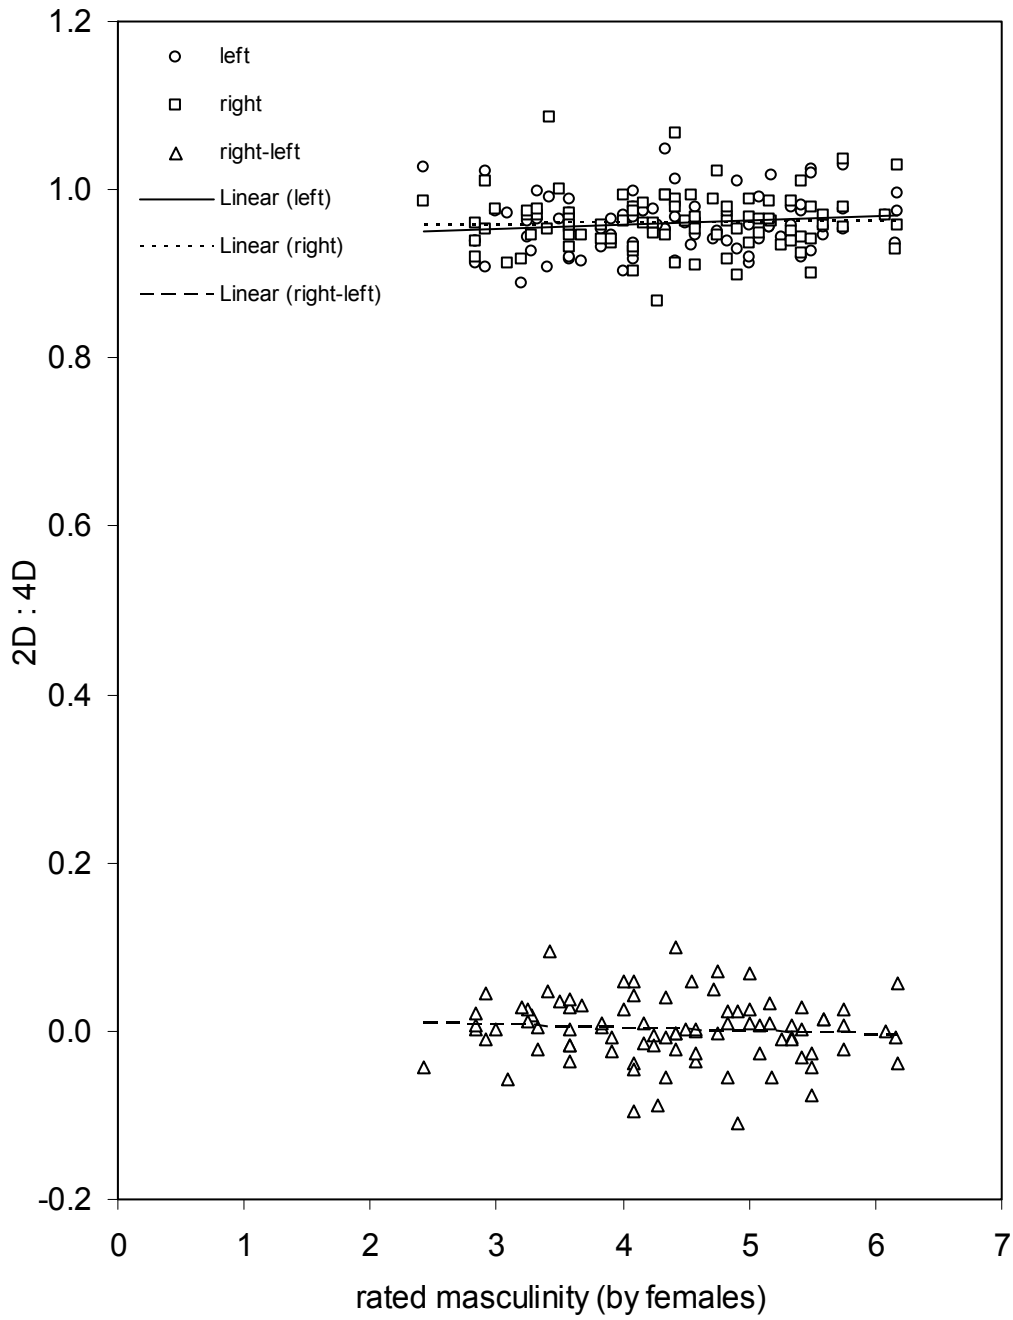

Figure 1. Relationships between rated facial masculinity (by females) and left average 2D : 4D, right average 2D : 4D and right average 2D : 4D - left average 2D : 4D for male participants (N = 88).

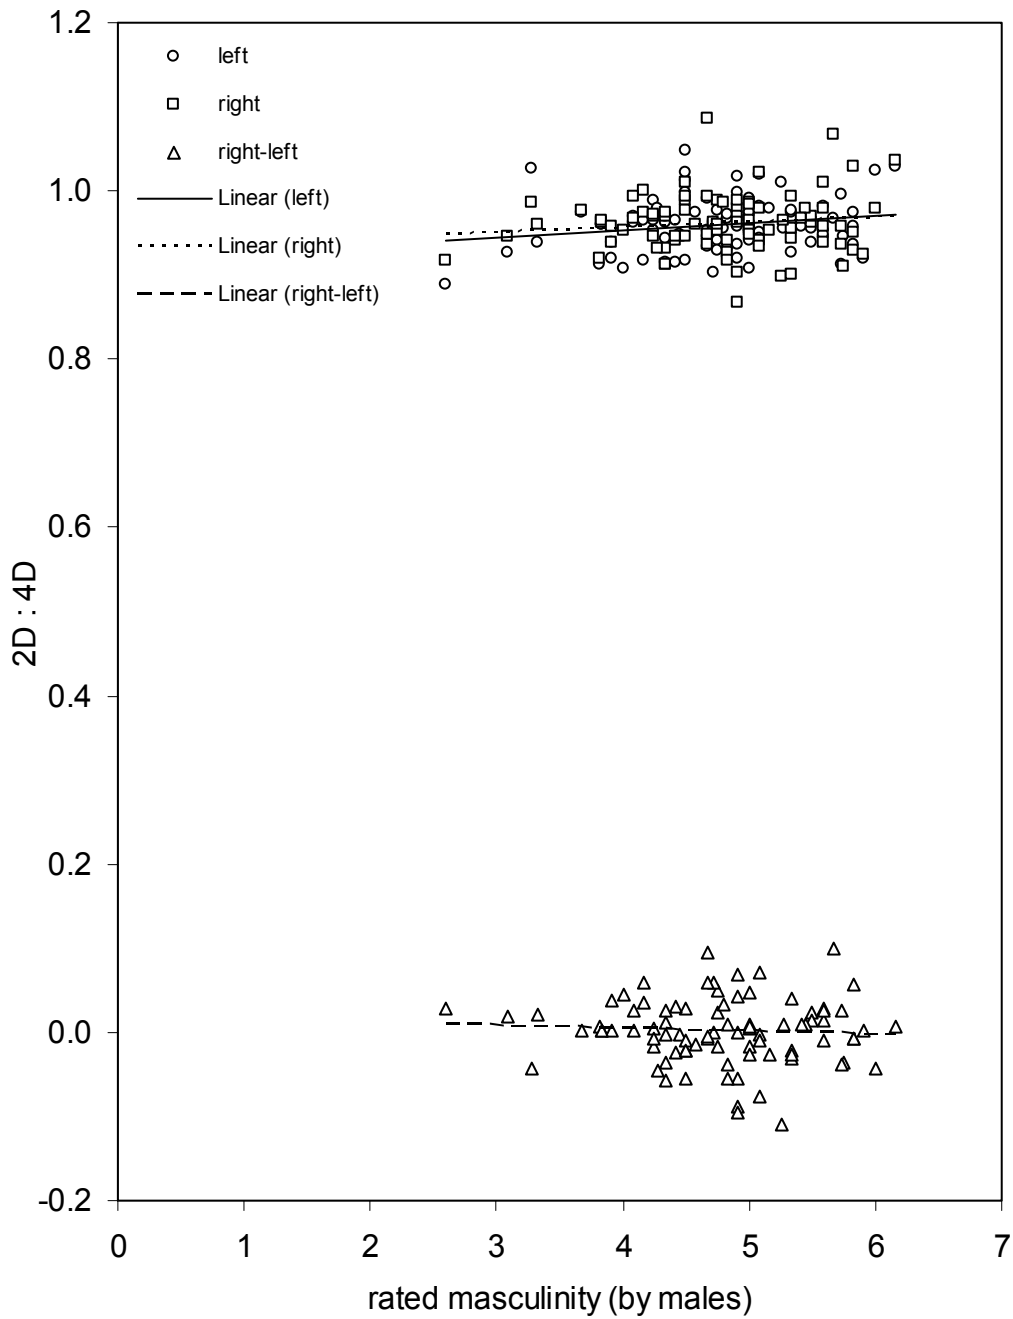

Figure 2. Relationships between rated facial masculinity (by males) and left average 2D : 4D, right average 2D : 4D and right average 2D : 4D - left average 2D : 4D for male participants (N = 88).
